# Supplementary material for: Enhancing Electrocatalytic Oxygen Reduction on Nitrogen-Doped Graphene by Active Sites Implantation
Source: PubMed Central journal article supplement — Sci Rep. 2013 Nov 22;3:3306. doi: 10.1038/srep03306 (PMC3837309; doi:10.1038/srep03306), 2013-11-22
Supplement: srep03306-s1.pdf [file srep03306-s1.pdf]

## **Supporting Information**

### **Enhancing Electrocatalytic Oxygen Reduction on Nitrogen-Doped Graphene by Active Sites Implantation**

Leiyu Feng, Lanqin Yang, Zujing Huang, Jingyang Luo, Mu Li, Dongbo Wang, Yinguang Chen\*

State Key Laboratory of Pollution Control and Resources Reuse, School of Environmental Science and Engineering,

Tongji University, Shanghai 200092, People's Republic of China

\*Corresponding author

E-mail: [yinguangchen@yahoo.com](mailto:yinguangchen@yahoo.com)

Tel: 86-21-65981263

Fax: 86-21-65986313

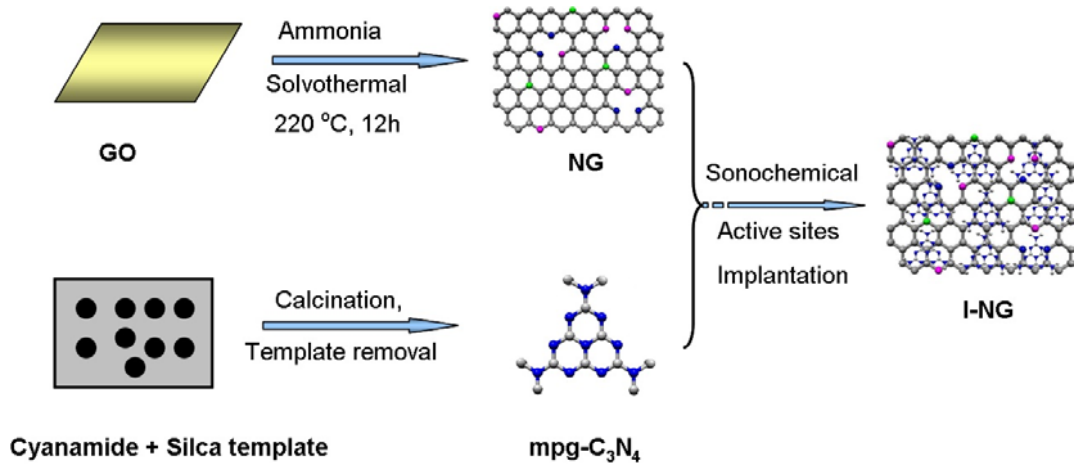

Figure S1. Schematic illustration of implantation process of nitrogen active sites for NG

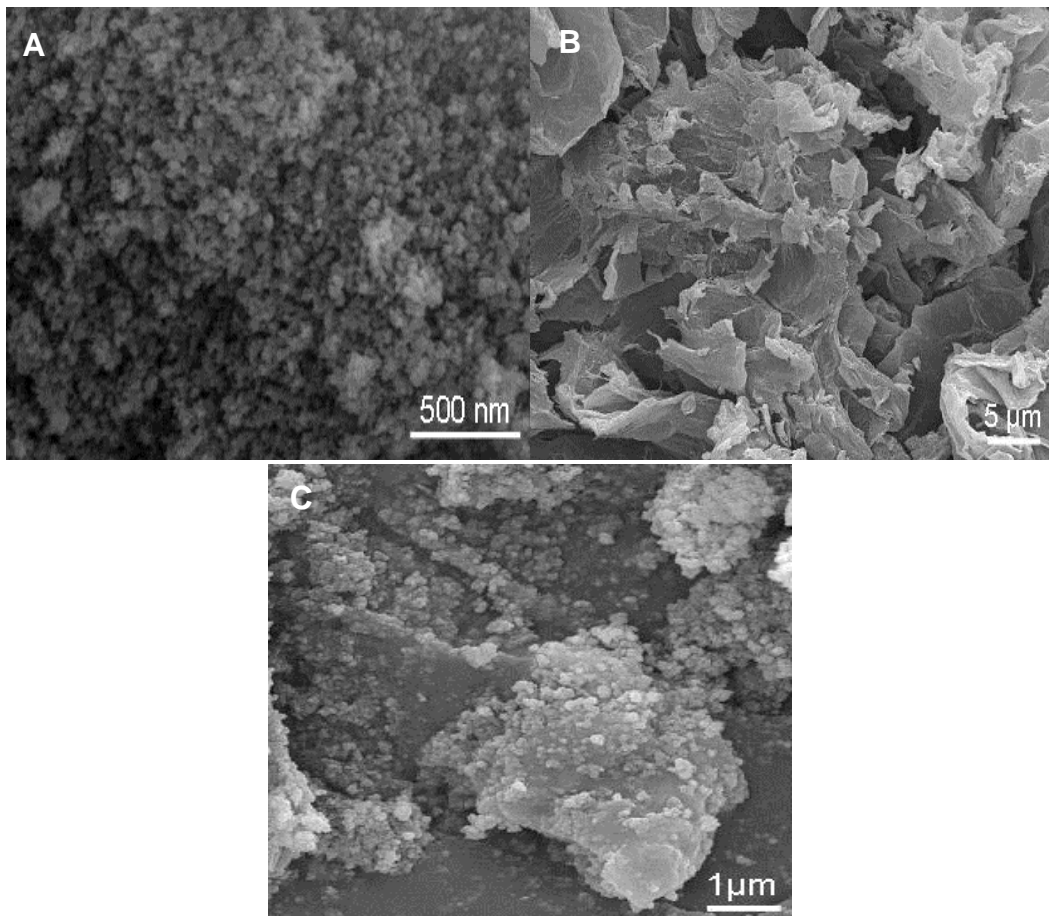

Figure S2. SEM images of (A) mpg-C<sub>3</sub>N<sub>4</sub>, (B) NG and (C) I-NG

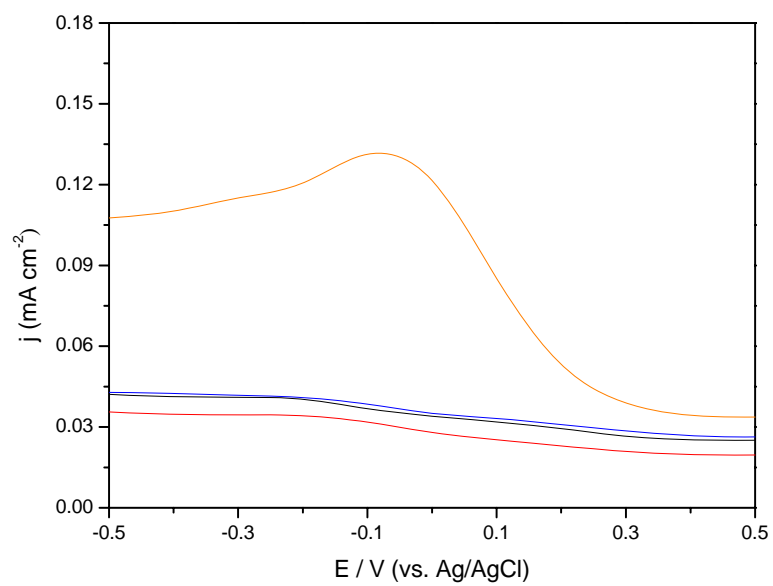

Figure S3. RRDE ring currents of I-NG (red line), Pt/C (black line), NG (blue line) and mpg-C<sub>3</sub>N<sub>4</sub> (orange line) electrodes at a rotation rate of 1200 rpm.

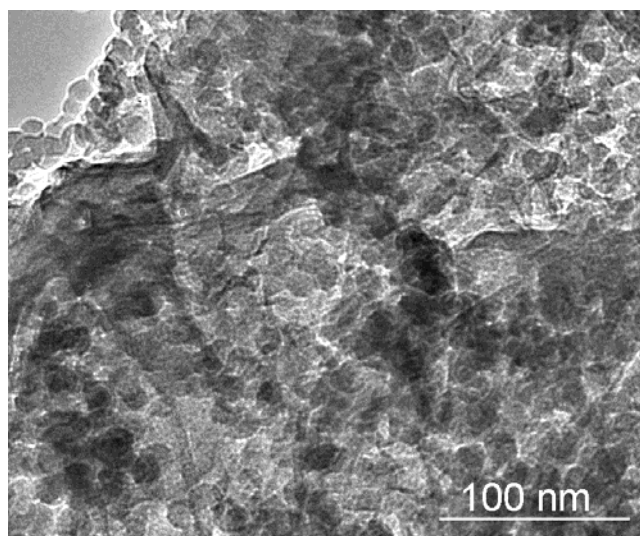

Figure S4. TEM image of I-NG after durability test

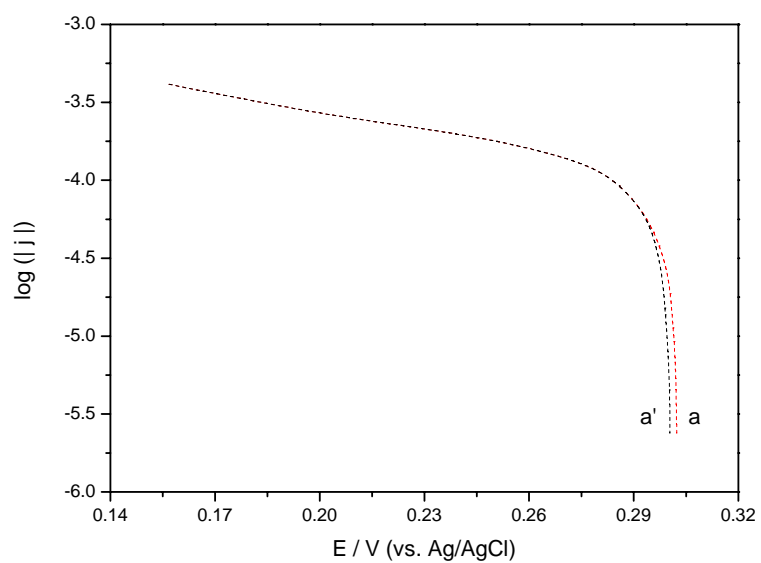

Figure S5. Tafel plots of I-NG electrode in  $O_2$ -saturated neutral phosphate buffer solution. The plots a and a' show the ORR performance of NG electrode before and after addition of 5 mM sodium formate to the electrolyte solution. The galvanodynamic experiments were performed at a scan rate of  $10^{-7}$  A/s.

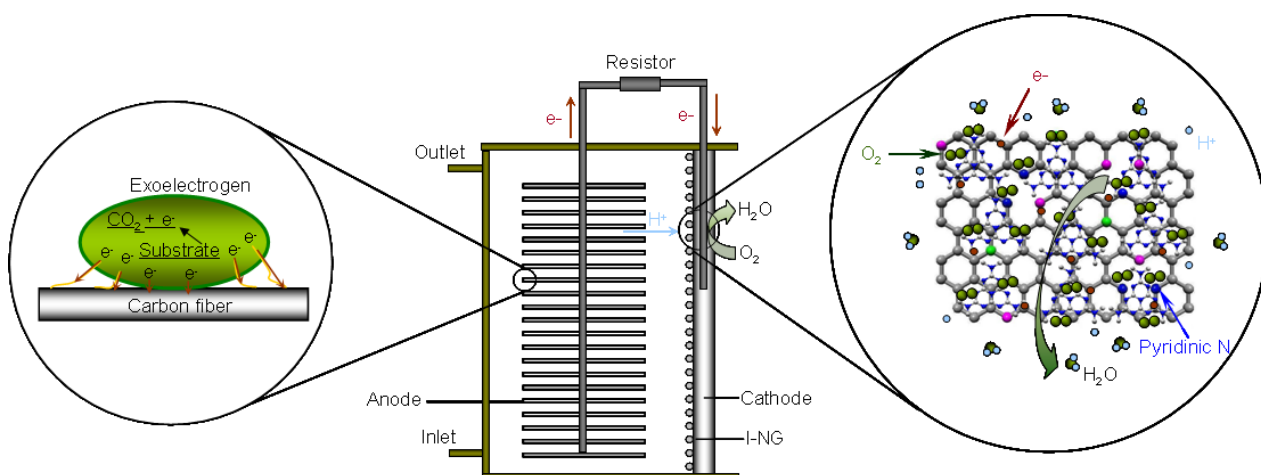

Figure S6. I-NG-MFCs used in this study

## Figure legends

**Figure S1:** Schematic illustration of implantation process of nitrogen active sites for NG

**Figure S2:** SEM images of (A) mpg-C<sub>3</sub>N<sub>4</sub>, (B) NG and (C) I-NG

**Figure S3:** RRDE ring currents of I-NG (red line), Pt/C (black line), NG (blue line) and mpg-C<sub>3</sub>N<sub>4</sub> (orange line) electrodes at a rotation rate of 1200 rpm.

**Figure S4:** TEM image of I-NG after durability test

**Figure S5:** Tafel plots of I-NG electrode in O<sub>2</sub>-saturated neutral phosphate buffer solution. The plots a and a' show the ORR performance of NG electrode before and after addition of 5 mM sodium formate to the electrolyte solution. The galvanodynamic experiments were performed at a scan rate of 10<sup>-7</sup> A/s.

**Figure S6:** I-NG-MFCs used in this study
